# Supplementary material
Source: PubMed Central journal article supplement (PMC8323989)
Supplement: NIHMS1725560-supplement-Supplemental_Materials.pdf [file NIHMS1725560-supplement-Supplemental_Materials.pdf]

Supplementary Materials for

**In vivo reprogramming of pathogenic lung TNFR2<sup>+</sup> cDC2s by IFN $\beta$  inhibits  
HDM-induced asthma**

Samira Mansouri *et al.*

Corresponding author: Lei Jin, lei.jin@medicine.ufl.edu

*Sci. Immunol.* **6**, eabi8472 (2021)  
DOI: 10.1126/sciimmunol.abi8472

**The PDF file includes:**

Figs. S1 to S8  
Table S1

**Other Supplementary Material for this manuscript includes the following:**

Table S2

## Supplemental Methods and Materials

**Supplemental table 1: Key resources**

| REAGENT or RESOURCE                                                 | SOURCE                    | IDENTIFIER      |
|---------------------------------------------------------------------|---------------------------|-----------------|
| <b>Antibodies and Secondary</b>                                     |                           |                 |
| Anti-mouse CD4-PE/Cy7 (clone: GK1.5)                                | BioLegend                 | Cat#100422      |
| Anti-mouse IL-4-APC (clone: 11B11)                                  | BioLegend                 | Cat#504106      |
| Anti-mouse IL-17a-PE (clone: TC11-1810.1)                           | BioLegend                 | Cat#506903      |
| Anti-mouse IL-4 – APC (clone: 11B11)                                | BioLegend                 | Cat#504105      |
| Anti-mouse CD45-PerCP/Cy5.5 (clone: 30-F11)                         | BioLegend                 | Cat#103131      |
| Anti-mouse CD45.1-APC (clone: A20)                                  | BioLegend                 | Cat#110713      |
| Anti-mouse MHCII(I-A/I-E)-Brilliant Violet 421 (clone: M5/114.15.2) | BioLegend                 | Cat#107636      |
| Anti-mouse MHCII(I-A/I-E)- Alexa Fluor (clone: M5/114.15.2)         | BioLegend                 | Cat#107622      |
| Anti-mouse/human CD11b- PE/Cy7 (clone: M1/70)                       | BioLegend                 | Cat#101216      |
| Anti-mouse/human CD11b- Brilliant Violet 605 (clone: M1/70)         | BioLegend                 | Cat#101237      |
| Anti-mouse CD64- PerCP/Cy5.5 (clone: X54-5/7.1)                     | BioLegend                 | Cat#139307      |
| Anti-mouse pSTAT3 (Y705) mAb (D3A7)                                 | Cell Signaling Technology | Cat#:9145       |
| Rabbit (DA1E) mAb IgG XP® Isotype Control                           | Cell Signaling Technology | Cat#:3900       |
| CD26 PECy7 (clone: H194-112)                                        | BioLegend                 | Cat#137810      |
| SiglecF APC (clone: S17007L)                                        | BioLegend                 | Cat#155507      |
| Anti-mouse/human Arg1-FITC                                          | RD systems                | Cat#IC5868F     |
| CD172a APC (clone: P84)                                             | Biolgend                  | Cat#144013      |
| Ly6G FITC (clone: RB6-8C5)                                          | BioLegend                 | Cat#108405      |
| Anti-mouse LAP (TGFβ1)-Brilliant Violet 421 (clone:TW7-16B4)        | BioLegend                 | Cat#141407      |
| Anti-mouse LAP (TGFβ1)-FITC (clone:TW7-16B4)                        | BioLegend                 | Cat#141413      |
| Anti-mouse OX40L-PE (clone: RM134L)                                 | BioLegend                 | Cat#108805      |
| Hamster IgG                                                         | BioXcell                  | Car#BE0091      |
| Anti-mouse TNFR2- PE (Clone:TR75-89)                                | BioLegend                 | Cat#113405      |
| Anti-mouse TNFR2-APC (Clone: REA228)                                | Miltenyi Biotec           | Cat#130-104-698 |
| Anti-mousePDL1-Brilliant Violet 421 (clone: 10F.9G2)                | BioLegend                 | Cat#124315      |
| Anti-mouse/human pSTAT1 (clone: 58D6)                               | Cell Signaling Technology | Cat#:9167       |
| Anti-mouse pErk1/2 (Thr202/Tyr204) mAb (D13.14.4E)                  | Cell Signaling Technology | Cat#:4370       |
| Anti-mouse ICOSL-PE (clone: HK5.3)                                  | BioLegend                 | Cat#107405      |
| Anti-mouse CD36                                                     | BioLegend                 | Cat# 102616     |

|                                                       |                           |                 |
|-------------------------------------------------------|---------------------------|-----------------|
| Anti-mouse IL-10 – APC (clone: JESS-16E3)             | BioLegend                 | Cat#505016      |
| Anti-mouse Foxp3-Pacific Blue (clone: MF-14)          | BioLegend                 | Cat#26410       |
| Anti-mouse T1ST2- APC (clone: D1H4)                   | BioLegend                 | Cat#146605      |
| Anti-mouse F4/80- PerCP/Cy5.5 (clone: BM8)            | BioLegend                 | Cat#123127      |
| Anti-mouse IgG-HRP                                    | Southern Biotech          | Cat#1033-05     |
| Anti-mouse IgE-HRP                                    | Southern Biotech          | Cat#1110-05     |
| Phospho-AMPK (Thr172) rabbit mAb                      | Cell Signaling Technology | Cat#2535        |
| GLUT1 (clone: SA0377)                                 | Invitrogen                | Cat#MA5-31960   |
| pS6 Ribosomal protein (S235/236) (clone: 2F9)         | Cell Signaling Technology | Cat#4856S       |
| Anti-CPT-1A rabbit antibody                           | ProteinTech               | Cat#15184-1-AP  |
| Anti-PPAR $\gamma$ rabbit antibody                    | CST                       | Cat#2435        |
| Anti-human CD1c- PE/Cy7 (clone: L161)                 | BioLegend                 | Cat#331515      |
| Anti-human CD14- PerCP/Cy5.5 (clone: 63D3)            | BioLegend                 | Cat#367109      |
| Anti-human CD206- FITC (clone: 15-2)                  | BioLegend                 | Cat#321103      |
| Anti-human TNFR2-APC (clone: 3G7A02)                  | BioLegend                 | Cat#358405      |
| Anti-human HLA-DR-APC/Cy7 (clone: L243)               | BioLegend                 | Cat#307617      |
| Anti-human PDL1- Brilliant Violet 421 (clone:29E.2A3) | BioLegend                 | Cat#329713      |
| Anti-human TGF $\beta$ 1- PE (clone: Tw4-2F8)         | BioLegend                 | Cat#349603      |
| Anti-human Arginase 1- PE (clone: 14D2C43)            | BioLegend                 | Cat#369703      |
| Anti-human IL-4- PE (clone: G077F6)                   | BioLegend                 | Cat#355003      |
| <b>Chemicals, ELISA kits and Recombinant Proteins</b> |                           |                 |
| OVA                                                   | Invivogen                 | cat#vac-pova    |
| DNase I                                               | Roche                     | Cat#10104159001 |
| MitoTracker Green FM                                  | Thermo Fisher Scientific  | Cat# M7514      |
| Erk1/2 inhibitor (GDC-0994,)                          | Selleckchem               | Cat # S7910     |
| Etomoxir                                              | Sigma                     | Cat # E1905     |
| Brefeldin A                                           | Biolegend                 | Cat#423303      |
| Recombinant mouse IFN $\alpha$ 1                      | R&D                       | Cat # 10148-IF  |
| Recombinant murine IFN $\beta$                        | R&D                       | Cat#8234-MB/CF  |
| Recombinant human IFN $\beta$                         | R&D                       | Cat # 8499-IF   |
| C1-BODIPY 500/510 C12                                 | Life Technologies,        | Cat# D-382      |
| Anti-TNFR2 monoclonal antibody (clone: TR75-54.7)     | BioXcell                  | Cat#BE0247      |
| Isotype Control (Armenian Hamster IgG)                | BioXcell                  | Cat#BE0091      |
| Anti-CD25 mAb (PC-61.5.3)                             | BioXcell                  | Cat#BE0012      |
| Isotype Control (Rat IgG1, $\kappa$ )                 | BioXcell                  | Cat#BE0088      |
| <b>Experimental Models: Organisms/Strains</b>         |                           |                 |
| Mouse: B6.CD45.1                                      | Jackson Laboratory        | Cat#002014      |

|                                |                       |                                                               |
|--------------------------------|-----------------------|---------------------------------------------------------------|
| Mouse: ERK2 <sup>fl/fl</sup>   | Jackson<br>Laboratory | Cat#019112                                                    |
| Mouse: STAT3 <sup>fl/fl</sup>  | Jackson<br>Laboratory | Cat#016923                                                    |
| Mouse: IFNAR1 <sup>-/-</sup>   | Jackson<br>Laboratory | Cat#028288                                                    |
| Mouse: CD11c <sup>Cre</sup>    | Jackson<br>Laboratory | Cat#008068                                                    |
| <b>Software and Algorithms</b> |                       |                                                               |
| FlowJo version 10.1r1          | FlowJo                | <a href="http://www.flowjo.com">http://www.flowjo.com</a>     |
| Prism6                         | GraphPad              | <a href="http://www.graphpad.com">http://www.graphpad.com</a> |

**Supplemental Figures.**

**Figure S1**

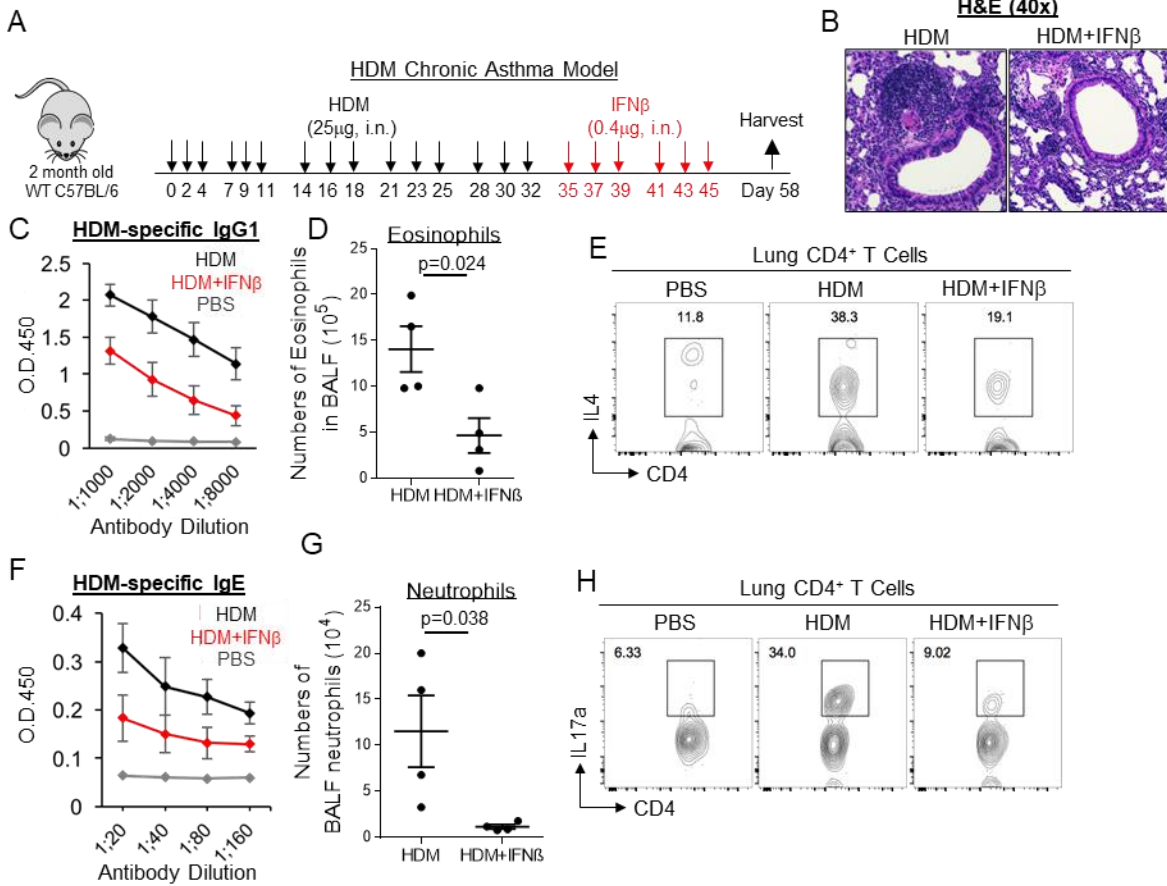

**Figure S1. Inhaled IFN $\beta$  alleviated HDM-induced chronic asthma.** **A.** Experimental protocol for treating HDM-induced chronic asthma. Mice were intranasally (*i.n.*) administered PBS or IFN $\beta$  (0.4 $\mu$ g). **B.** Representative H&E staining of lung sections from asthmatic mice treated with PBS or IFN $\beta$ . (n=3-4 mice per group). Data are representative of 3 independent experiments. **C,** **F.** Serum HDM-specific IgG1 and BALF HDM-specific IgE from asthmatic mice treated with IFN $\beta$  (n=3-4 mice per group). Data are representative of 3 independent experiments. **D.** Absolute numbers of eosinophils in the BALF of asthmatic mice treated with IFN $\beta$  (n=3-4 mice per group). Data were representative of 3 independent experiments. **E.** Flow cytometry plots of IL4 producing lung CD4<sup>+</sup> T cells from asthmatic mice treated with IFN $\beta$  (n=3-4 mice per group). Data are representative of 3 independent experiments. **G.** Absolute numbers of neutrophils in the BALF of asthmatic mice treated with IFN $\beta$  (n=3-4 mice per group). Data were representative of 3 independent experiments. **H.** Flow cytometry plots of IL17 producing lung CD4<sup>+</sup> T cells from asthmatic mice treated with IFN $\beta$  (n=3-4 mice per group). Data are representative of 3 independent experiments. Graphs represent the mean with error bars indication s.e.m. *P* values determined by unpaired student *t*-test.

Figure S2

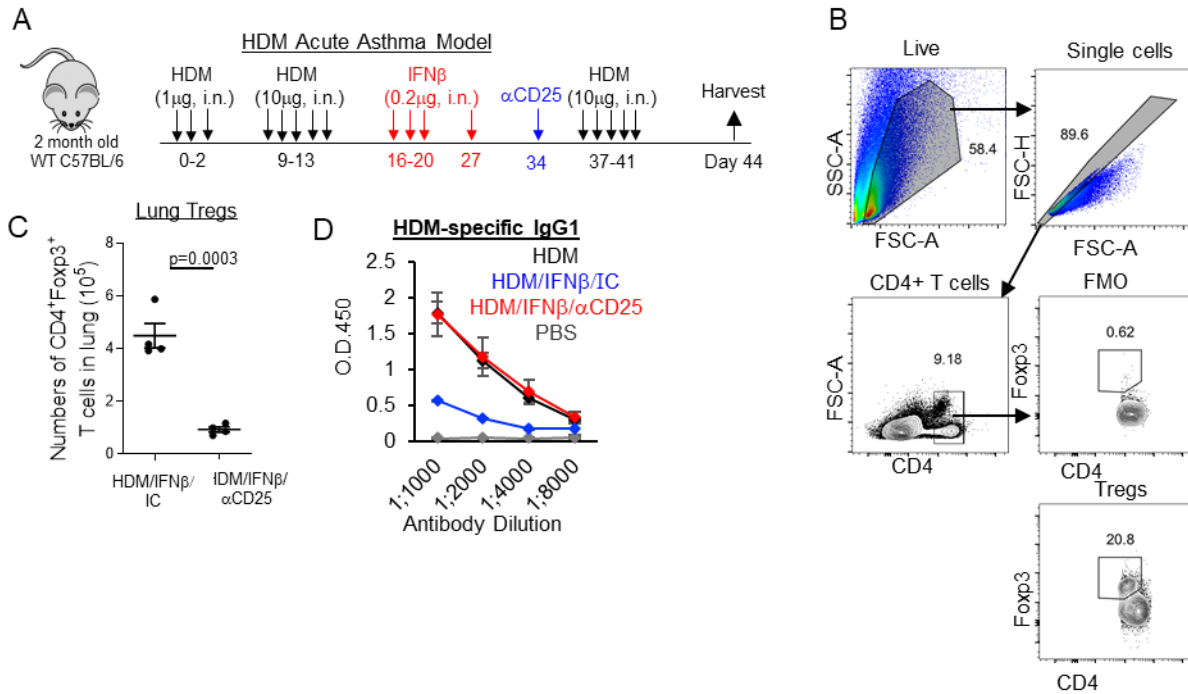

**Figure S2. IFN $\beta$  efficacy depends on Tregs in HDM mice.** **A.** An experimental protocol for Treg depletion in IFN $\beta$ -treated asthmatic mice. Anti-CD25 mAb (PC-61.5.3, 100 $\mu$ g in 40 $\mu$ l PBS) or rat IgG1 isotype control were administered (*i.n.*) on day 34. Asthma exacerbation was induced with daily HDM treatment on day 37-41. The mice were harvest on day 44. (n=4 mice/group). **B.** Lung Tregs was gated on live CD4<sup>+</sup>Fop3<sup>+</sup> cells. **C.** The number of lung Tregs on day 44 were enumerated. Data are representative of 2 independent experiments. **D.** Serum HDM-specific IgG1 in asthmatic mice treated with anti-CD25 mAb or isotype control from mice in **A.** Data are representative of 2 independent experiments. Graphs represent the mean with error bars indication s.e.m. *P* values determined by unpaired student *t*-test.

**Figure S3**

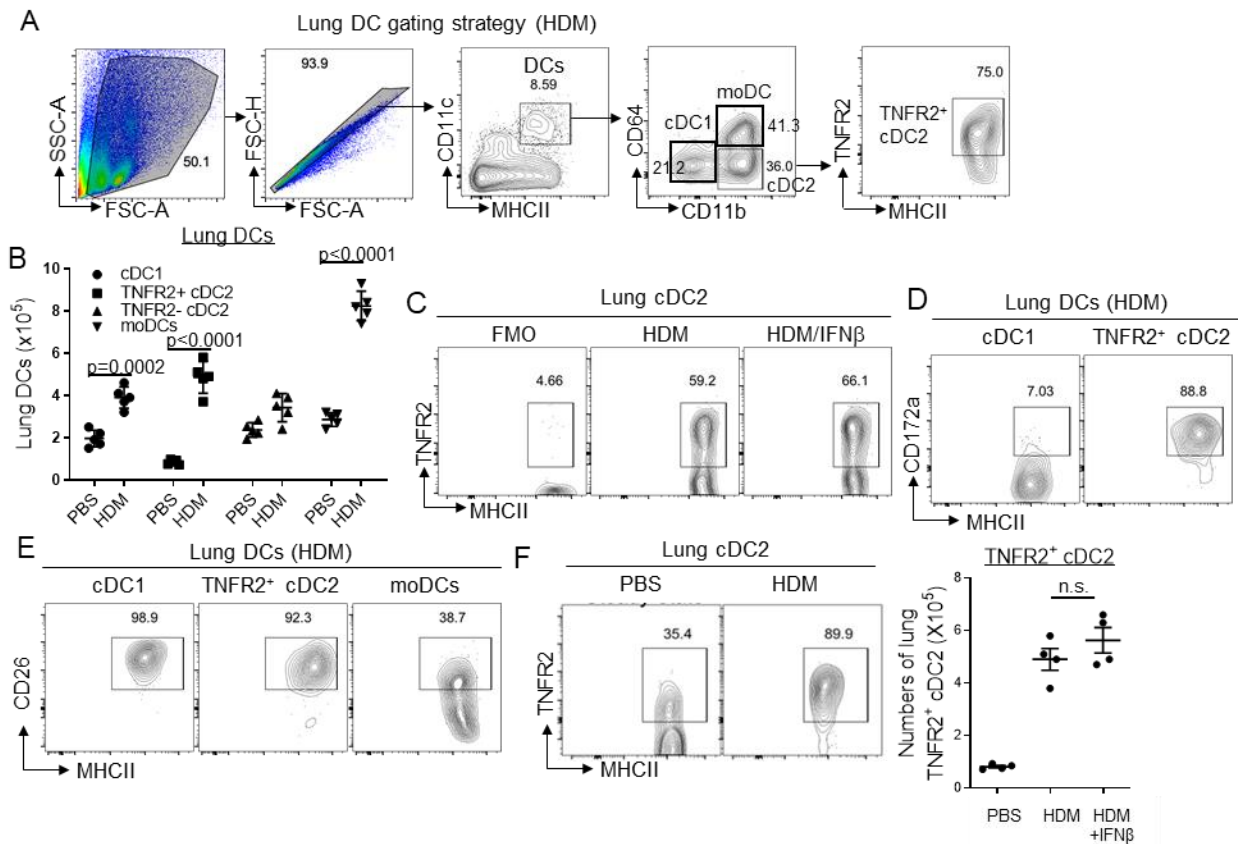

**Figure S3. Gating strategy of lung TNFR2<sup>+</sup> cDC2 in HDM-induced asthmatic mice.** **A.** Lung TNFR2<sup>+</sup> cDC2 was gated on live CD64<sup>-</sup>CD11B<sup>+</sup>TNFR2<sup>+</sup>MHC II<sup>+</sup>CD11C<sup>+</sup> cells. **B, C, F.** Numbers of lung cDC1, moDCs, TNFR2<sup>-</sup>, TNFR2<sup>+</sup> cDC2 in C57BL/6J mice treated with PBS, HDM or HDM/IFN $\beta$ . (n=4-5 mice/group). Data are representative of 3 independent experiments. **D-E.** Flow analysis of CD172a (SIRP $\alpha$ ) and CD26 expression on indicated DCs subsets. (n=4-5 mice/group). Data are representative of 3 independent experiments. Graphs represent the mean with error bars indication s.e.m. *P* values determined by two-way ANOVA Sidak's multiple comparison (**B**) or one-way ANOVA Tukey's multiple comparison test (**F**).

**Figure S4**

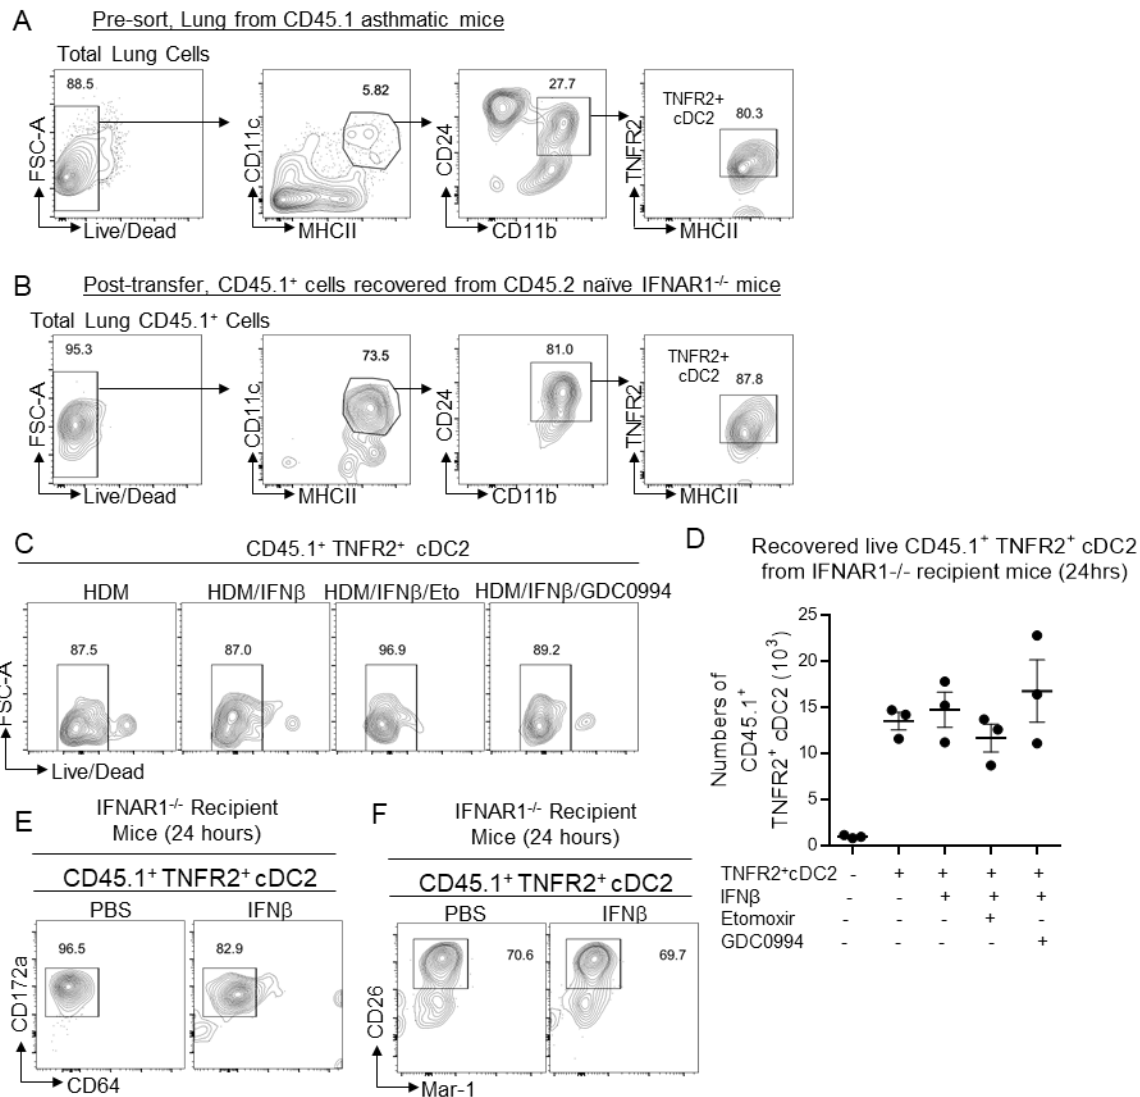

**Figure S4. Sorting strategy of lung TNFR2<sup>+</sup> cDC2 for the adoptive transfer. A-B, E-F.** Flow analysis of pre-sort and post-transfer of lung CD45.1<sup>+</sup> TNFR2<sup>+</sup> cDC2 population (n=3 mice/group). Data are representative of 2 independent experiments. **C.** Sorted CD45.1 TNFR2<sup>+</sup> cDC2 from HDM mice were treated with IFN $\beta$ , IFN $\beta$ +Etomoxir, or IFN $\beta$ +GDC0994 or untreated (HDM) for 30mins in culture. Cell viability were determined by Propidium Iodide stain. Data are representative of 2 independent experiments. **D.** Recipient mice were harvested after 24hrs. Recovered lung CD45.1 cells were enumerated. (n=3 mice/group). Data were representative of 2 independent experiments. Graphs represent the mean with error bars indication s.e.m. *P* values determined by one-way ANOVA Tukey's multiple comparison test.



**Figure S5**

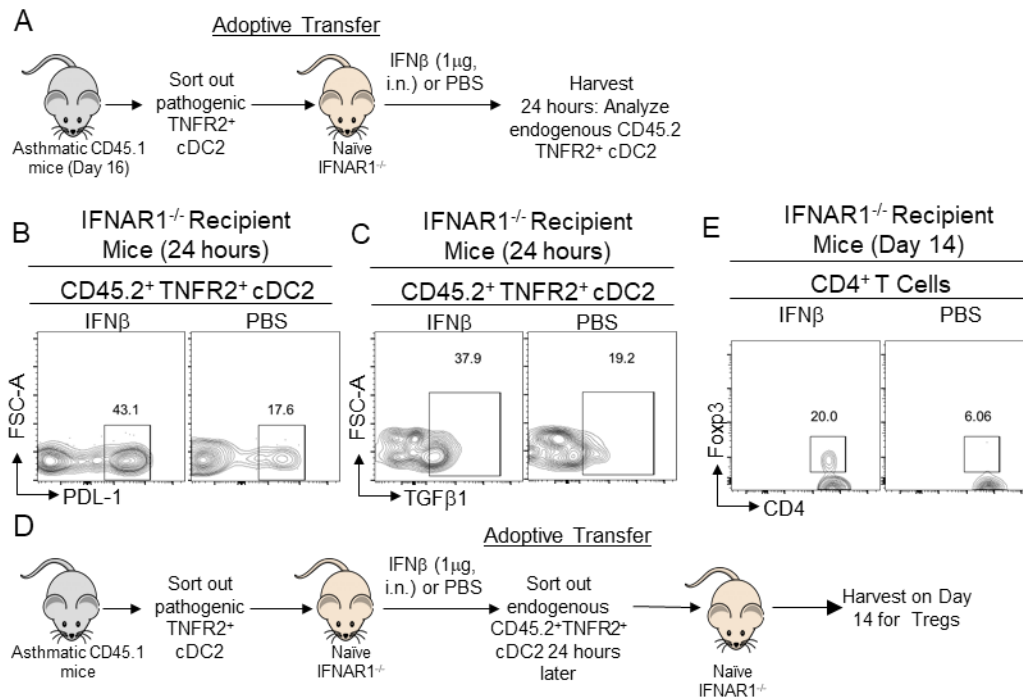

**Figure S5. IFN $\beta$ -reprogrammed WT TNFR2<sup>+</sup> cDC2 primes bystander IFNAR1<sup>-/-</sup> TNFR2<sup>+</sup> cDC2 to generate lung Tregs.** **A.** A cartoon illustrate the adoptive transfer experiment. **B-C.** Flow analysis of CD45.2<sup>+</sup> endogenous TNFR2<sup>+</sup> cDC2 population (n=3 mice/group). Data are representative of 2 independent experiments. **D.** A cartoon illustrate the consecutive adoptive transfer experiments. **E.** Flow analysis of lung Tregs on day 14 in the IFNAR1<sup>-/-</sup> recipient mice receiving sorted CD45.2<sup>+</sup> TNFR2<sup>+</sup> cDC2 population. (n=3 mice/group). Data are representative of 2 independent experiments.

**Figure S6**

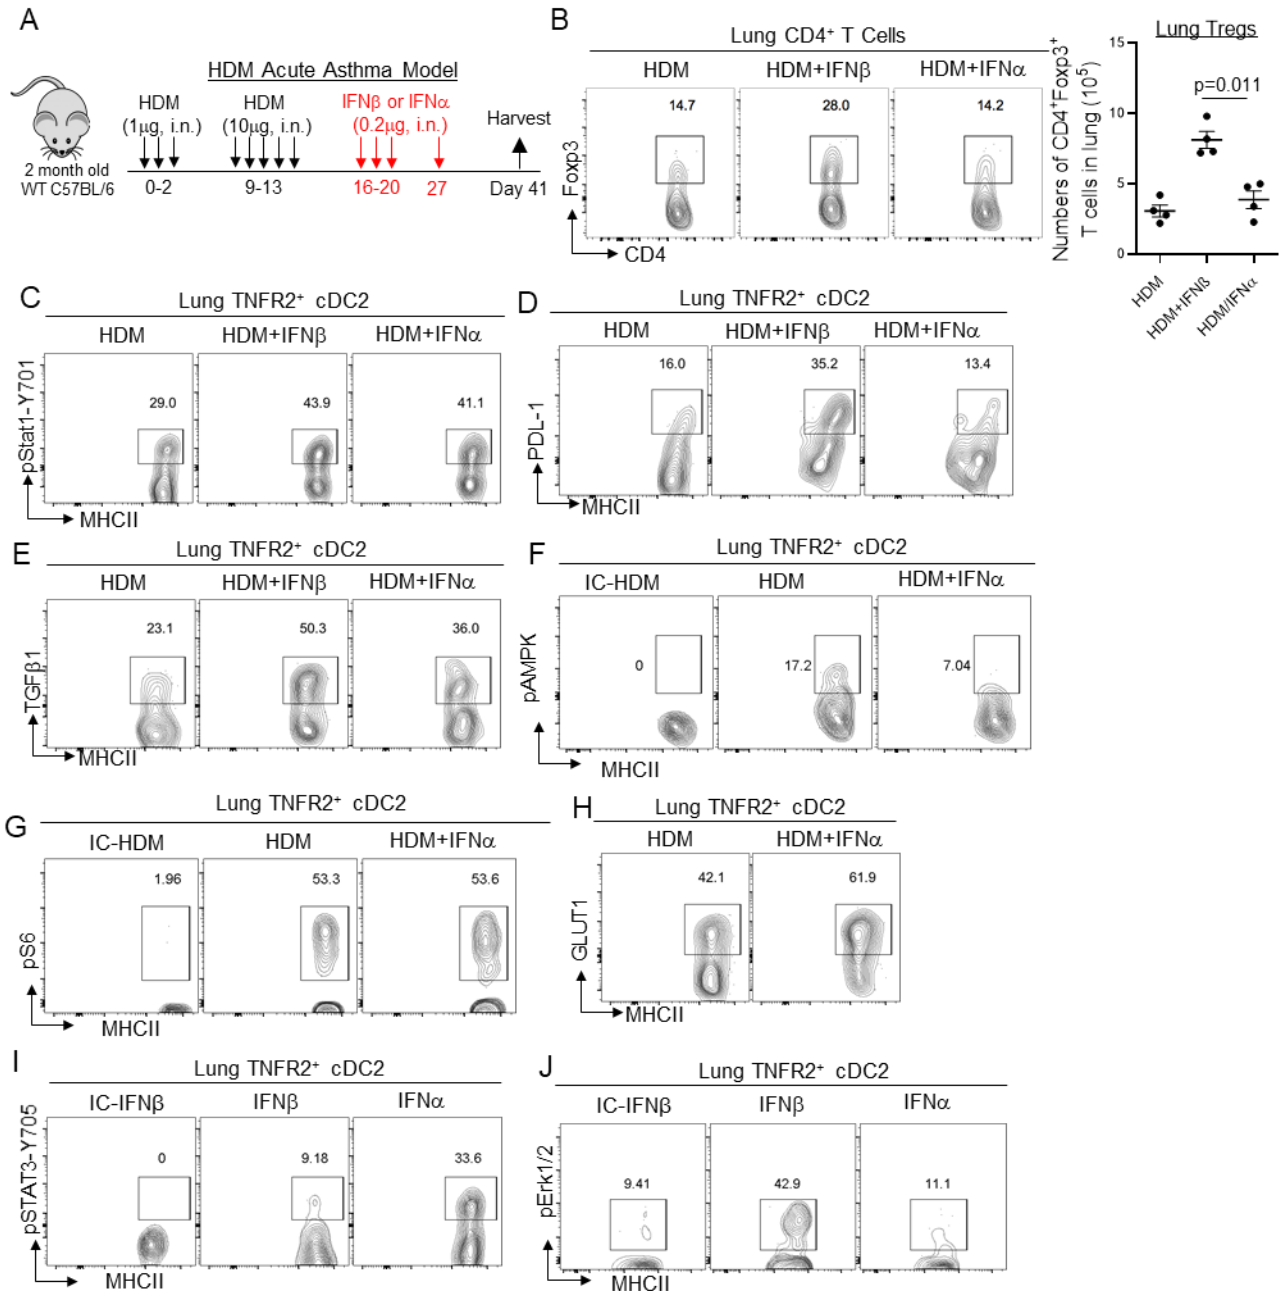

**Figure S6. IFNα does not generate lung Tregs in HDM mice and cannot reprogram pathogenic lung TNFR2<sup>+</sup> cDC2s *in vivo*.** **A.** Experimental protocol for HDM-induced acute asthma. Mice were intranasally (*i.n.*) administered IFNβ (0.2 μg) or IFNα1 (0.2 μg). **B.** Flow cytometry analysis (left) and absolute number (right) of lung Tregs in asthmatic mice treated with PBS, IFNβ or IFNα1 (0.2 μg) (n=4 mice per group). Data are representative of 2 independent experiments. **C-E.** Flow cytometry analysis of pSTAT1, PD-L1 and TGFβ1 expression in lung TNFR2<sup>+</sup> cDC2 from asthmatic mice treated with IFNβ or IFNα1 as in **A**. Data are representative of 2 independent experiments. **F-H.** Flow cytometry analysis of pS6, pAMPK

and GLUT1 expression in lung TNFR2<sup>+</sup> cDCs of WT mice 2 days after 100µg HDM and IFNα1 (1µg) administration (*i.n.*). (n=3 mice per group). Data are representative of 2 independent experiments. **I-J.** Flow cytometry analysis of p-ERK1/2 and p-STAT3 in lung TNFR2<sup>+</sup> cDC2 of C57BL/6J mice treated (*i.n.*) with IFNβ or IFNα1 (1µg) for 24hrs (n=4 mice per group). Data are representative of 2 independent experiments. IC: isotype control. Graphs represent the mean with error bars indication s.e.m. *P* values determined by one-way ANOVA Tukey's multiple comparison test.

**Figure S7**

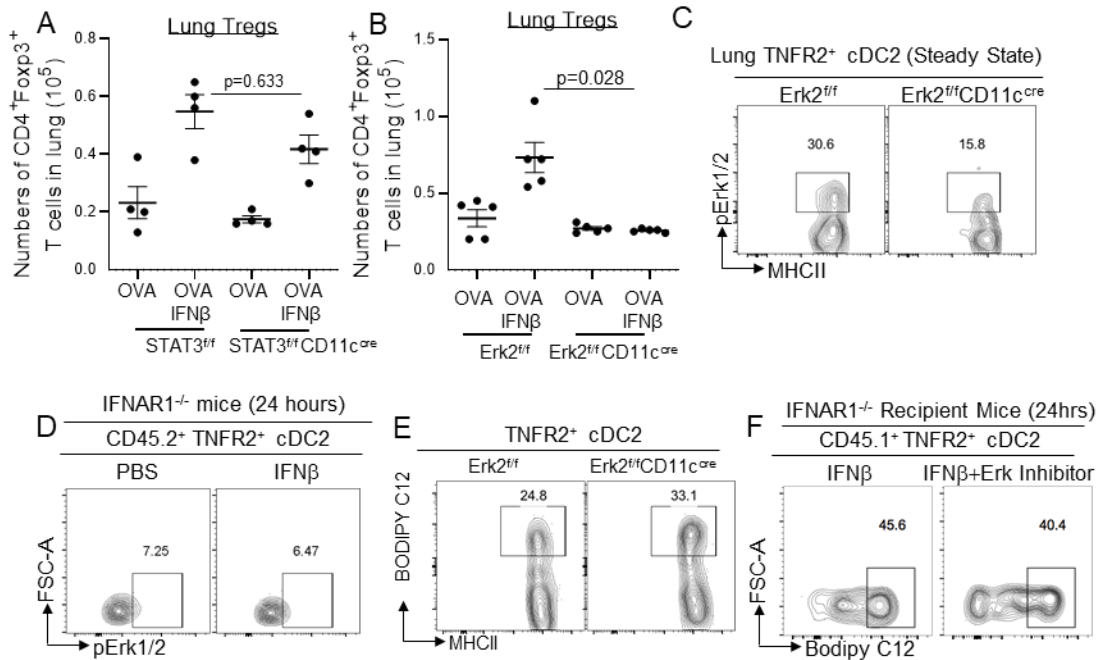

**Figure S7. Erk2 expression in CD11c<sup>+</sup> cells is required for Tregs induction but is dispensable for fatty acid uptakes.** **A-B.** Quantification of CD4<sup>+</sup>Foxp3<sup>+</sup> Tregs in STAT3<sup>f/f</sup>, STAT3<sup>f/f</sup>CD11c<sup>cre</sup> (**A**), and ERK2<sup>f/f</sup>, ERK2<sup>f/f</sup>CD11c<sup>cre</sup> (**B**) mice treated (*i.n.*) with one dose of OVA (2μg) or OVA/IFNβ (0.2μg). Lungs were harvested on day 14. (n=4~5 mice per group). Data are representative of 2 independent experiments. **C.** Flow cytometry analysis of pErk1/2 in TNFR2<sup>+</sup> cDC2s from Erk2<sup>f/f</sup> and Erk2<sup>f/f</sup>CD11c<sup>cre</sup> mice at steady state. (n=3 mice per group). Data are representative of 3 independent experiments. **D.** Lung CD45.1<sup>+</sup>TNFR2<sup>+</sup>cDC2s from HDM-induced asthmatic mice were adoptively transferred into IFNAR1<sup>-/-</sup> CD45.2 recipient mice. Recipient mice were treated with IFNβ (1μg). Flow cytometry analysis of pErk1/2 in CD45.2 TNFR2<sup>+</sup>cDC2s following IFNβ treatment. (n=3 mice per group). Data are representative of 2 independent experiments. **E.** Flow cytometry analysis of BODIPY C<sub>12</sub> uptake in TNFR2<sup>+</sup> cDC2 of Erk2<sup>f/f</sup> and Erk2<sup>f/f</sup>CD11c<sup>cre</sup> mice. (n=3 mice per group). Data are representative of 3 independent experiments. **F.** CD45.1<sup>+</sup>TNFR2<sup>+</sup>cDC2 were sorted out of asthmatic mice, treated with GDC-0994 (50nM) for 30 mins. The cells were then adoptively transferred (*i.n.*) into naïve IFNAR1<sup>-/-</sup> mice. Recipient mice were then treated with IFNβ (*i.n.*, 1μg). Flow cytometry analysis of BODIPY C<sub>12</sub> uptake in CD45.1<sup>+</sup>TNFR2<sup>+</sup>cDC2. (n=3 mice per group). Data are representative of 2 independent experiments. Graphs represent the mean with error bars indication s.e.m. *P* values determined by one-way ANOVA Tukey's multiple comparison test.

**Figure S8**

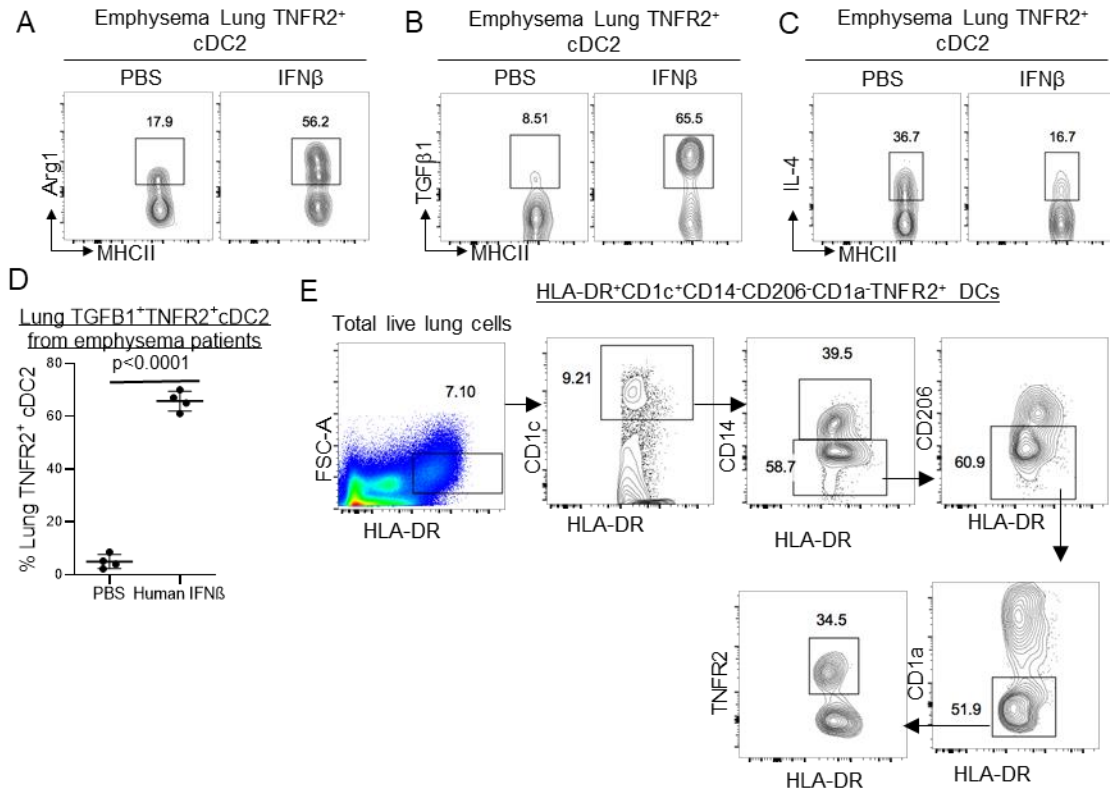

**Figure S8. IFN $\beta$  enhances tolerogenic markers on pathogenic human lung TNFR2<sup>+</sup> cDC2s.** **A-D.** Flow cytometry analysis and frequency of human lung TNFR2<sup>+</sup> cDC2s from emphysema patients treated with human recombinant IFN $\beta$  (0.4 $\mu$ g) or PBS for 24hrs *ex vivo*. **E.** Human lung cDC2 were gated on live, HLA-DR<sup>+</sup>CD1c<sup>+</sup>CD14<sup>-</sup>CD206<sup>-</sup> cells as before<sup>3</sup> (n=4 emphysema patients). Graphs represent the mean with error bars indication s.e.m. *P* values determined by unpaired Student's *t*-test.
